# Supplementary material for: Knowledge of lifespan and healthspan and interest in Healthy Longevity Medicine among the general population in Singapore: The Singapore HEalthy LOngevity (HELO) survey
Source: Research Square preprint supplement (doi:10.21203/rs.3.rs-6694270/v1), 2025-07-29
Supplement: Supplementary file 1 [file 4d6eb1456b093e20c180feb5.docx]

**Table 1·** Characteristics of participants

|  | **n** | **Total (N=3034)** |
| --- | --- | --- |
| Age, year, median, IQR | 3029 | 46, [34 – 59] |
| Perceived age, year, median, IQR | 2999 | 41, [32 – 56] |
| Perceived age - Chronological age, year, IQR | 2996 | -1, [-5 - -1] |
| Gender | | |
| Female | 3031 | 1641 (54·1) |
| Male | 1372 (45·2) |
| Other | 18 (0·6) |
| Ethnicity | | |
| Chinese | 3032 | 2155 (71·0) |
| Indian | 358 (11·8) |
| Malay | 353 (11·6) |
| Others | 166 (5·5) |
| Residency | | |
| Citizen | 3033 | 2531 (83·4) |
| Permanent Resident | 307 (10·1) |
| Non-resident/Foreigner | 195 (6·4) |
| Work | | |
| Full-time | 3033 | 1915 (63·1) |
| Part-time/Casual Worker | 319 (10·5) |
| Retired and working | 53 (1·7) |
| Retired | 393 (13·0) |
| Unemployed | 353 (11·6) |
| Education | | |
| Postgraduate Degree | 3033 | 443 (14·6) |
| Undergraduate Degree | 945 (31·1) |
| Diploma / Certificate /  Professional Certificate | 864 (28·5) |
| Secondary School or equivalent | 596 (19·6) |
| Primary School or equivalent | 153 (5·0) |
| No formal education | 32 (1·1) |
| Religion | | |
| Buddhism | 3032 | 839 (27·7) |
| Christianity | 719 (23·7) |
| Islam | 457 (15·1) |
| Hinduism | 230 (7·6) |
| Taoism | 157 (5·2) |
| No religion | 559 (18·4) |
| Other religion | 71 (2·3) |
| Marital status | | |
| Married | 3034 | 1940 (63·9) |
| Single (never married) | 857 (28·2) |
| Divorced | 120 (4·0) |
| Widowed | 97 (3·2) |
| Separated | 20 (0·7) |
| Children, yes | 3034 | 1847 (60·9) |
| Grandchildren, yes | 3029 | 419 (13.8) |
| Family members past 90 years | | |
| No | 2773 | 1826 (60·2) |
| Yes | 873 (28·8) |
| Don’t know | 74 (2·4) |
| Monthly household income | | |
| $500 or below | 3025 | 103 (3·4) |
| $501 – $1,000 | 117 (3·9) |
| $1,001 – $2,500 | 249 (8·2) |
| $2,501 – $5,000 | 527 (17·4) |
| $5,001 – $10,000 | 817 (26·9) |
| $10,001 or more | 807 (26·6) |
| Refuse to answer | 405 (13·3) |
| Monthly individual income | | |
| No income |  | 518 (17·1) |
| $500 or below | 3032 | 86 (2·8) |
| $501 – $1,000 | 179 (5·9) |
| $1,001 – $2,500 | 381 (12·6) |
| $2,501 – $5,000 | 782 (25·8) |
| $5,001 – $10,000 | 620 (20·4) |
| $10,001 or more | 229 (7·5) |
| Refuse to answer | 237 (7·8) |
| Housing | | |
| HDB 1-room or 2-room | 3029 | 121 (4·0) |
| HDB 3-room | 612 (20·2) |
| HDB 4-room | 1058 (34·9) |
| HDB 5-room or Executive | 813 (26·8) |
| Condominium or other apartment | 335 (11·0) |
| Landed / Others | 90 (2·9) |
| Height, cm, median, IQR | 3024 | 164 [158 – 171] |
| Weight, kg, median, IQR | 3029 | 63, [55 – 74] |
| BMI, kg/m2, median, IQR | 3023 | 23·4, [20·9 – 26·6] |
| Chronic disease, no | 3030 | 2355 (77·6) |
| Medications taken, no | 3033 | 2052 (67·6) |
| Supplements use, yes | 3031 | 1519 (50·1) |
| Alcohol consumption per week | | |
| 0 | 3033 | 2098 (69·1) |
| 1–7 drinks | 796 (26·2) |
| 8–14 drinks | 54 (1·8) |
| 15+ drinks | 37 (1·2) |
| Refuse to answer | 48 (1·6) |
| Smoking | | |
| Never smoked | 3030 | 2442 (80·5) |
| Used to smoke regularly | 312 (10·3) |
| Currently smoke | 276 (9·1) |
| Exercise | | |
| 0 days | 3028 | 579 (19·1) |
| 1 day | 416 (13·7) |
| 2 days | 501 (16·5) |
| 3 days | 571 (18·8) |
| 4 days | 280 (9·2) |
| 5 days | 297 (9·8) |
| 6 days | 88 (2·9) |
| 7 days | 296 (9·8) |
| Health Insurance | | |
| Government | 3034 | 2051 (67·6) |
| Private | 835 (27·52) |
| None | 148 (4·88) |
| Enrolled in HealthierSG | | |
| No | 3033 | 1478 (48·7) |
| Yes | 1435 (47·3) |
| Not qualified to enrol | 120 (4·0) |
| Done annual health screening, yes | 3032 | 1634 (53.9) |

*Notes: Data are presented as n (%) unless otherwise indicated.*

*Abbreviations: IQR=Interquartile range, HDB=Housing Development Board, BMI=Body mass index*

**Table 2: Association between demographic characteristics and knowledge of lifespan and healthspan and interest in attending Healthy Longevity Medicine clinics.**

|  | **Knowledge of lifespan** | | **Knowledge of healthspan** | |  | **Interested in HLM clinics** | |
| --- | --- | --- | --- | --- | --- | --- | --- |
|  | Crude OR [95% CI] | *P* | Crude OR [95% CI] | *P* |  | Crude OR [95% CI] | *P* |
| **Chronological age, year** | 0·98 [0·97–0·98] | **<0·001** | 1·00 [0·99–1·00] | 0·230 |  | 0·99 [0·98–0·99] | **<0·001** |
| **Gender, female, reference** | | | | | | | |
| Male | 1·28 [1·06–1·55] | **0·010** | 1·13 [0·98–1·31] | 0·090 |  | 1·20 [1·04–1·39] | **0·010** |
| Other | 0·62 [0·22–1·75] | 0·370 | 1·20 [0·47–3·07] | 0·700 |  | 0·43 [0·16–1·16] | 0·100 |
| **Ethnicity, Chinese, reference** | | | | | | | |
| Indian | 0·46 [0·36–0·60] | **<0·001** | 1·00 [0·80–1·25] | 0·990 |  | 0·82 [0·65–1·02] | 0·080 |
| Malay | 0·58 [0·44–0·76] | **<0·001** | 0·83 [0·66–1·04] | 0·110 |  | 0·80 [0·64–1·01] | 0·060 |
| Others | 0·63 [0·43–0·93] | **0·020** | 0·91 [0·66–1·26] | 0·580 |  | 1·30 [0·94–1·79] | 0·120 |
| **Residency, Citizen, reference** | | | | | | | |
| Permanent Resident | 0·75 [0·56–1·01] | 0·060 | 1·44 [1·13–1·82] | **0·003** |  | 1·21 [0·95–1·54] | 0·120 |
| Non–resident | 0·55 [0·39–0·76] | **<0·001** | 1·10 [0·82–1·48] | 0·530 |  | 0·73 [0·54–0·98] | **0·030** |
| **Religion, Buddhism, reference** | | | | | | | |
| Christianity | 1·41 [1·06–1·86] | **0·020** | 1·23 [1·01–1·51] | **0·040** |  | 1·74 [1·42–2·14] | **<0·001** |
| Islam | 0·68 [0·52–0·90] | **0·007** | 0·96 [0·76–1·21] | 0·750 |  | 1·03 [0·82–1·29] | 0·830 |
| Hinduism | 0·57 [0·40–0·80] | **0·001** | 1·03 [0·77–1·39] | 0·830 |  | 0·81 [0·60–1·08] | 0·150 |
| Taoism | 0·84 [0·55–1·28] | 0·410 | 0·91 [0·64–1·29] | 0·590 |  | 0·90 [0·64–1·27] | 0·540 |
| No religion | 1·5 [1·10–2·03] | **0·010** | 0·97 [0·78–1·20] | 0·760 |  | 1·12 [0·90–1·39] | 0·310 |
| Other religion | 0·63 [0·36–1·11] | 0·110 | 0·85 [0·51–1·40] | 0·520 |  | 0·99 [0·61–1·61] | 0·970 |

* *p-value refers to the comparison with the reference group*

*Abbreviations: OR=Odds ratio, CI=Confidence interval*

**Table 3: Association between demographic characteristics and knowledge of lifespan and healthspan and interest in attending Healthy Longevity Medicine clinics, adjusted for chronological age.**

|  | **Knowledge of lifespan** | | | |  | **Knowledge of healthspan** | | | | |  | **Interested in HLM clinics** | | | |
| --- | --- | --- | --- | --- | --- | --- | --- | --- | --- | --- | --- | --- | --- | --- | --- |
|  | Crude OR [95% CI] | *P* | Adjusted OR [95% CI] | *P* |  | Crude OR [95% CI] | | *P* | Adjusted OR [95% CI] | *P* |  | Crude OR [95% CI] | *P* | Adjusted OR [95% CI] | *P* |
| **Marital status, married, reference** | | | | | | | | | | | | | | | |
| Single never married | 1·33  [1.06–1.66] | **0.013** | 1·02  [0·80–1·30] | 0·866 |  | 0·89  [0·76–1·05] | | 0·180 | 0·84  [0·71–1·00] | 0·059 |  | 1·06  [0·90–1·25] | 0·460 | 0·91  [0·77–1·09] | 0·318 |
| Divorced | 0·80  [0·51–1·26] | 0·340 | 0·92  [0·58–1·46] | 0·736 |  | 0·91  [0·62–1·32] | | 0·610 | 0·91  [0·62–1·32] | 0·616 |  | 1·02  [0·70–1·48] | 0·910 | 1·07  [0·74–1·56] | 0·719 |
| Widowed | 0·55  [0·35–0·86] | **0·009** | 0·84  [0·52–1·34] | 0·458 |  | 0·80  [0·53–1·22] | | 0·310 | 0·88  [0·57–1·36] | 0·553 |  | 0·67  [0·45–1·01] | 0·060 | 0·86  [0·56–1·31] | 0·474 |
| Separated | 0·52  [0·20–1·36] | 0·180 | 0·52  [0·20–1·38] | 0·192 |  | 0·73  [0·29–1·84] | | 0·510 | 0·74  [0·29–1·85] | 0·515 |  | 1·89  [0·72–4·93] | 0·200 | 1·92  [0·73–5·03] | 0·184 |
| **Children, yes** | 0·70  [0·57–0·85] | **<0·001** | 0·91  [0·74–1·13] | 0·413 |  | 1·07  [0·92–1·23] | | 0·397 | 1·13  [0·96–1·33] | 0·136 |  | 0·91  [0·79–1·05] | 0·209 | 1·06  [0·90–1·25] | 0·475 |
| **Grandchildren, yes** | 0·43  [0·34–0·54] | **<0·001** | 0·63  [0·47–0·83] | **0·001** |  | 0·86  [0·70–1·06] | | 0·159 | 0·88  [0·69–1·13] | 0·326 |  | 0·64  [0·52–0·80] | **<0·001** | 0·78  [0·61–0·99] | **0·043** |
| **Family members past 90 years, yes, reference** | | | | | | | | | | | | | | | |
| No | 0·92  [0·74–1·14] | 0·429 | 0·90  [0·72–1·12] | 0·335 |  | 0·73  [0·62–0·86] | **<0·001** | | 0·73  [0·62–0·86] | **<0·001** |  | 0·87  [0·74–1·03] | 0·105 | 0·87  [0·74–1·03] | 0·098 |
| Don’t know | 1·15  [0·59–2·24] | 0·680 | 0·97  [1·50–1·90] | 0·933 |  | 0·54  [0·33–0·89] | | **0·017** | 0·52  [0·32–0·87] | **0·012** |  | 0·89  [0·55–1·44] | 0·641 | 0·82  [0·51–1·33] | 0·416 |
| **Education, Postgraduate Degree, reference** | | | | | | | | | | | | | | | |
| Undergraduate Degree | 1·45  [1·00–2·10] | **0·050** | 1·45  [1·00–2·10] | 0·052 |  | 0·92  [0·74–1·16] | | 0·481 | 0·94  [0·75–1·18] | 0·577 |  | 1·08  [0·85–1·36] | 0·550 | 1·08  [0·85–1·38] | 0·517 |
| Diploma / Certificate / Professional Certificate | 0·68  [0·49–0·97] | **0·030** | 0·69  [0·49–0·97] | **0·034** |  | 0·76  [0·60–0·95] | | **0·017** | 0·75  [0·60–0·95] | **0·016** |  | 0·55  [0·44–0·70] | **<0·001** | 0·56  [0·44–0·71] | **<0·001** |
| Secondary School or equivalent | 0·30  [0·21–0·42] | **<0·001** | 0·30  [0·21–0·43] | **<0·001** |  | 0·59  [0·46–0·75] | **<0·001** | | 0·55  [0·42–0·71] | **<0·001** |  | 0·35  [0·27–0·46] | **<0·001** | 0·35  [0·27–0·45] | **<0·001** |
| Primary School or equivalent | 0·16  [0·10–0·24] | **<0·001** | 0·16  [0·10–0·25] | **<0·001** |  | 0·49  [0·33–0·72] | **<0·001** | | 0·43  [0·28–0·64] | **<0·001** |  | 0·40  [0·27–0·58] | **<0·001** | 0·38  [0·26–0·56] | **<0·001** |
| No formal education | 0·09  [0·04–0·19] | **<0·001** | 0·09  [0·04–0·19] | **<0·001** |  | 0·20  [0·08–0·54] | | **0·001** | 0·18  [0·07–0·48] | **<0·001** |  | 0·12  [0·05–0·30] | **<0·001** | 0·12  [0·05–0·29] | **<0·001** |
| **Work status, Full-time, reference** | | | | | | | | | | | | | | | |
| Part-time/Casual Worker | 0·98  [0·70–1·35] | 0·880 | 1·08  [0·77–1·51] | 0·640 |  | 0·80  [0·63–1·02] | | 0·080 | 0·82  [0·64–1·05] | 0·119 |  | 0·88  [0·70–1·12] | 0·310 | 0·91  [0·71–1·16] | 0·432 |
| Retired and working | 0·56  [0·29–1·06] | 0·070 | 0·89  [0·46–1·72] | 0·730 |  | 0·93  [0·54–1·62] | | 0·800 | 1·10  [0·62–1·93] | 0·753 |  | 1·13  [0·64–1·98] | 0·680 | 1·34  [0·75–2·38] | 0·322 |
| Retired | 0·55  [0·43–0·72] | **<0·001** | 0·99  [0·72–1·36] | 0·960 |  | 1·11  [0·89–1·38] | | 0·350 | 1·34  [1·03–1·74] | **0·029** |  | 0·55  [0·44–0·69] | **<0·001** | 0·67  [0·52–0·87] | **0·003** |
| Unemployed | 0·61  [0·46–0·80] | **<0·001** | 0·61  [0·46–0·81] | **<0·001** |  | 0·53  [0·42–0·68] | **<0·001** | | 0·53  [0·41–0·68] | **<0·001** |  | 0·55  [0·44–0·70] | **<0·001** | 0·55  [0·44–0·69] | **<0·001** |
| **Monthly household income, $500 or below, reference** | | | | | | | | | | | | | | | |
| $501 – $1,000 | 1·17  [0·68–2·04] | 0·570 | 1·12  [0·65–1·96] | 0·680 |  | 1·30  [0·75–2·26] | | 0·340 | 1·30  [0·75–2·26] | 0·345 |  | 1·41  [0·81–2·45] | 0·220 | 1·39  [0·80–2·41] | 0·245 |
| $1,001 – $2,500 | 1·50  [0·92–2·43] | 0·100 | 1·44  [0·89–2·35] | 0·138 |  | 1·08  [0·67–1·75] | | 0·750 | 1·08  [0·66–1·75] | 0·754 |  | 1·46  [0·90–2·36] | 0·130 | 1·44  [0·89–2·32] | 0·142 |
| $2,501 – $5,000 | 2·88  [1·82–4·55] | **<0·001** | 2·57  [1·62–4·09] | **<0·001** |  | 0·98  [0·63–1·53] | | 0·940 | 0·98  [0·63–1·53] | 0·926 |  | 2·12  [1·36–3·30] | **<0·001** | 2·00  [1·28–3·13] | **0·002** |
| $5,001 – $10,000 | 4·47  [2·85–7·02] | **<0·001** | 3·83  [2·42–6·08] | **<0·001** |  | 1·73  [1·13–2·66] | | **0·010** | 1·73  [1·12–2·67] | **0·014** |  | 3·04  [1·97–4·69] | **<0·001** | 2·86  [1·84–4·44] | **<0·001** |
| $10,001 or more | 6·13  [3·85–9·76] | **<0·001** | 5·24  [3·27–8·42] | **<0·001** |  | 1·56  [1·02–2·41] | | **0·040** | 1·57  [1·01–2·42] | **0·044** |  | 4·42  [2·85–6·84] | **<0·001** | 4·17  [2·69–6·50] | **<0·001** |
| Refuse to answer | 1·48  [0·94–2·33] | 0·090 | 1·41  [0·89–2·22] | 0·143 |  | 1·23  [0·78–1·94] | | 0·370 | 1·22  [0·78–1·93] | 0·389 |  | 1·67  [1·06–2·64] | **0·030** | 1·62  [1·03–2·56] | **0·038** |
| **Monthly individual income, $500 or below, reference** | | | | | | | | | | | | | | | |
| $501 – $1,000 | 1·17  [0·62–2·23] | 0·630 | 1·30  [0·68–2·48] | 0·432 |  | 1·43  [0·83–2·45] | | 0·200 | 1·44  [0·84–2·47] | 0·191 |  | 0·97  [0·58–1·62] | 0·900 | 1·00  [0·60–1·68] | 0·991 |
| $1,001 – $2,500 | 0·84  [0·48–1·49] | 0·560 | 0·96  [0·54–1·70] | 0·875 |  | 1·47  [0·89–2·41] | | 0·130 | 1·49  [0·90–2·44] | 0·118 |  | 1·06  [0·67–1·70] | 0·790 | 1·11  [0·69–1·77] | 0·676 |
| $2,501 – $5,000 | 1·46  [0·84–2·54] | 0·180 | 1·43  [0·82–2·51] | 0·207 |  | 1·51  [0·94–2·43] | | 0·090 | 1·51  [0·94–2·43] | 0·087 |  | 1·60  [1·02–2·49] | **0·040** | 1·59  [1·02–2·49] | **0·042** |
| $5,001 – $10,000 | 2·67  [1·48–4·80] | **0·001** | 2·71  [1·50–4·91] | **<0·001** |  | 1·60  [0·99–2·58] | | **0·050** | 1·59  [0·99–2·57] | 0·056 |  | 1·96  [1·24–3·09] | **0·004** | 1·98  [1·26–3·11] | **0·003** |
| $10,001 or more | 2·62  [1·32–5·21] | **0·006** | 2·74  [1·38–5·47] | **0·004** |  | 1·95  [1·16–3·28] | | **0·010** | 1·97  [1·17–3·32] | **0·011** |  | 2·43  [1·46–4·04] | **<0·001** | 2·53  [1·52–4·21] | **<0·001** |
| No income | 0·79  [0·45–1·38] | 0·410 | 0·98  [0·56–1·73] | 0·951 |  | 1·10  [0·68–1·79] | | 0·690 | 1·11  [0·68–1·82] | 0·670 |  | 0·79  [0·50–1·24] | 0·300 | 0·85  [0·53–1·34] | 0·480 |
| Refuse to answer | 0·67  [0·37–1·21] | 0·190 | 0·72  [0·40–1·31] | 0·281 |  | 1·54  [0·92–2·59] | | 0·100 | 1·53  [0·91–2·57] | 0·109 |  | 0·86  [0·53–1·41] | 0·560 | 0·87  [0·53–1·44] | 0·595 |
| **Housing, HDB 1-room or 2-room, reference** | | | | | | | | | | | | | | | |
| HDB 3-room | 0·93  [0·59–1·49] | 0·770 | 0·93  [0·59–1·49] | 0·773 |  | 0·94  [0·63–1·40] | | 0·760 | 0·95  [0·64–1·41] | 0·788 |  | 0·70  [0·47–1·03] | 0·070 | 0·72  [0·48–1·07] | 0·105 |
| HDB 4-room | 1·34  [0·85–2·11] | 0·210 | 1·34  [0·85–2·11] | 0·211 |  | 0·89  [0·62–1·31] | | 0·560 | 0·89  [0·61–1·30] | 0·549 |  | 0·75  [0·51–1·10] | 0·140 | 0·74  [0·51–1·09] | 0·127 |
| HDB 5-room or Executive | 1·66  [1·04–2·65] | **0·030** | 1·66  [1·04–2·65] | **0·035** |  | 1·02  [0·69–1·50] | | 0·910 | 1·03  [0·70–1·52] | 0·871 |  | 0·97  [0·66–1·44] | 0·900 | 1·00  [0·68–1·48] | 0·985 |
| Condominium or other apartment | 2·00  [1·17–3·43] | **0·010** | 2·00  [1·17–3·43] | **0·011** |  | 1·00  [0·65–1·52] | | 0·990 | 1·00  [0·66–1·52] | 0·997 |  | 1·68  [1·09–2·58] | **0·020** | 1·70  [1·10–2·62] | **0·016** |
| Landed / Others | 1·44  [0·71–2·89] | 0·310 | 1·44  [0·71–2·89] | 0·311 |  | 1·37  [0·79–2·38] | | 0·260 | 1·38  [0·80–2·40] | 0·245 |  | 1·11  [0·63–1·93] | 0·720 | 1·14  [0·65–2·00] | 0·639 |

* *p-value refers to the comparison with the reference group*

*Abbreviations: OR=Odds ratio, CI=Confidence interval, HDB=Housing Development Board.*

**Table 4: Association between health characteristics and knowledge of lifespan and healthspan and interest in attending Healthy Longevity Medicine clinics, adjusted for chronological age.**

|  | **Knowledge of lifespan** | | | |  | **Knowledge of healthspan** | | | |  | **Interested in HLM clinics** | | | |
| --- | --- | --- | --- | --- | --- | --- | --- | --- | --- | --- | --- | --- | --- | --- |
|  | Crude OR [95% CI] | *P* | Adjusted OR [95% CI] | *P* |  | Crude OR [95% CI] | *P* | Adjusted OR [95% CI] | *P* |  | Crude OR [95% CI] | *P* | Adjusted OR [95% CI] | *P* |
| **Perceived age - Chronological age, year** | 0·99  [0·99–1·00] | 0·196 | 0·99  [0·98–1·00] | 0·085 |  | 0·99  [0·98–0·99] | **0·015** | 0·99  [0·97–0·99] | **0·005** |  | 0·99  [0·99–1·00] | 0·384 | 0·99  [0·99–1·00] | 0·209 |
| **BMI, kg/m2** | 0·96  [0·94–0·97] | **<0·001** | 0·96  [0·94–0·97] | **<0·001** |  | 0·98  [0·96–0·99] | **0·001** | 0·99  [0·99–1·00] | 0·237 |  | 0·98  [0·96–0·99] | **0·001** | 0·99  [0·98–0·99] | **0·002** |
| **Chronic disease, no** | 1·30  [1·05–1·62] | **0·016** | 0·91  [0·72–1·16] | 0·441 |  | 1·06  [0·89–1·26] | 0·510 | 1·01  [0·84–1·23] | 0·902 |  | 1·18  [1·00–1·40] | 0·060 | 1·00  [0·83–1·21] | 0·990 |
| **Medication, no** | 1·46  [1·20–1·77] | **<0·001** | 1·05  [0·85–1·31] | 0·636 |  | 1·05  [0·90–1·22] | 0·570 | 1·01  [0·85–1·20] | 0·911 |  | 1·09  [0·93–1·27] | 0·270 | 0·92  [0·77–1·08] | 0·305 |
| **Supplements use, yes** | 1·44  [1·19–1·74] | **<0·001** | 1·55  [1·28–1·88] | **<0·001** |  | 1·38  [1·20–1·60] | **<0·001** | 1·40  [1·21–1·62] | **<0·001** |  | 1·68  [1·45–1·94] | **<0·001** | 1·75  [1·51–2·03] | **<0·001** |
| **Alcohol consumption, per week, 0 drinks, reference** | | | | | | | | | | | | | | |
| 1 –7 drinks | 2·20  [1·71–2·83] | **<0·001** | 1·78  [1·50–2·11] | **<0·001** |  | 1·31  [1·11–1·54] | **0·001** | 1·30  [1·10–1·53] | **0·002** |  | 1·86  [1·57–2·21] | **<0·001** | 1·78  [1·50–2·12] | **<0·001** |
| 8 –14 drinks | 0·80  [0·42–1·50] | 0·480 | 1·31  [0·76–2·28] | 0·328 |  | 0·96  [0·55–1·68] | 0·890 | 0·96  [0·55–1·67] | 0·884 |  | 1·35  [0·78–2·34] | 0·280 | 1·32  [0·76–2·28] | 0·328 |
| 15+ drinks | 0·79  [0·37–1·68] | 0·530 | 0·79  [0·41–1·52] | 0·479 |  | 0·73  [0·36–1·45] | 0·370 | 0·73  [0·36–1·46] | 0·369 |  | 0·79  [0·41–1·51] | 0·480 | 0·79  [0·41–1·52] | 0·479 |
| Refuse to answer | 1·09  [0·53–2·28] | 0·810 | 0·45  [0·25–0·83] | 0·011 |  | 0·76  [0·41–1·39] | 0·370 | 0·76  [0·41–1·38] | 0·363 |  | 0·46  [0·25–0·85] | **0·010** | 0·45  [0·25–0·83] | **0·011** |
| **Smoking, never smoked, reference** | | | | | | | | | | | | | | |
| Used to smoke regularly | 1·02  [0·74–1·39] | 0·920 | 0·97  [0·71–1·32] | 0·835 |  | 1·02  [0·80–1·30] | 0·860 | 1·02  [0·80–1·29] | 0·894 |  | 1·0  [0·83–1·34] | 0·660 | 1·03  [0·81–1·31] | 0·785 |
| Currently smoke | 0·92  [0·67–1·26] | 0·590 | 0·86  [0·63–1·19] | 0·369 |  | 0·89  [0·69–1·15] | 0·390 | 0·89  [0·69–1·15] | 0·366 |  | 0·87  [0·68–1·11] | 0·260 | 0·85  [0·66–1·09] | 0·193 |
| **Exercise, per week, 0 days, reference** | | | | | | | | | | | | | | |
| 1 day | 1·22  [0·88–1·68] | 0·240 | 1·14  [0·82–1·58] | 0·428 |  | 1·20  [0·92–1·56] | 0·180 | 1·19  [0·91–1·55] | 0·201 |  | 1·47  [1·14–1·90] | **0·002** | 1·43  [1·11–1·85] | **0·006** |
| 2 days | 1·62  [1·17–2·24] | **0·003** | 1·45  [1·05–2·02] | **0·025** |  | 1·60  [1·25–2·05] | **<0·001** | 1·58  [1·23–2·03] | **<0·001** |  | 1·54  [1·21–1·96] | **<0·001** | 1·46  [1·15–1·87] | **0·002** |
| 3 days | 1·15  [0·86–1·54] | 0·350 | 1·10  [0·82–1·48] | 0·540 |  | 1·45  [1·14–1·84] | **0·002** | 1·44  [1·14–1·84] | **0·003** |  | 1·59  [1·26–2·01] | **<0·001** | 1·55  [1·23–1·96] | **<0·001** |
| 4 days | 1·55  [1·05–2·29] | **0·030** | 1·51  [1·01–2·24] | **0·043** |  | 1·70  [1·27–2·27] | **<0·001** | 1·67  [1·25–2·24] | **<0·001** |  | 1·46  [1·10–1·95] | **0·009** | 1·41  [1·06–1·89] | **0·019** |
| 5 days | 1·41  [0·97–2·05] | 0·070 | 1·45  [0·99–2·11] | 0·053 |  | 1·85  [1·39–2·46] | **<0·001** | 1·85  [1·39–2·47] | **<0·001** |  | 1·67  [1·25–2·21] | **<0·001** | 1·69  [1·27–2·25] | **<0·001** |
| 6 days | 1·26  [0·70–2·27] | 0·450 | 1·42  [0·77–2·61] | 0·262 |  | 1·93  [1·23–3·03] | **0·005** | 1·89  [1·20–2·98] | **0·006** |  | 1·61  [1·02–2·53] | **0·040** | 1·70  [1·07–2·69] | **0·024** |
| 7 days | 0·90  [0·64–1·27] | 0·550 | 1·02  [0·72–1·44] | 0·910 |  | 1·58  [1·18–2·10] | **0·002** | 1·60  [1·20–2·14] | **0·001** |  | 1·26  [0·95–1·66] | 0·110 | 1·34  [1·01–1·78] | **0·042** |
| **Health Insurance, Government, reference** | | | | | | | | | | | | | | |
| Private | 0·76  [0·62–0·94] | **0·010** | 0·70  [0·56–0·87] | **0·001** |  | 0·89  [0·76–1·05] | 0·170 | 0·88  [0·74–1·03] | 0·117 |  | 1·00  [0·85–1·18] | 0·990 | 0·97  [0·82–1·14] | 0·676 |
| None | 0·23  [0·16–0·32] | **<0·001** | 0·21  [0·15–0·30] | **<0·001** |  | 0·39  [0·27–0·58] | **<0·001** | 0·39  [0·26–0·58] | **<0·001** |  | 0·55  [0·39–0·76] | **<0·001** | 0·53  [0·38–0·74] | **<0·001** |
| **Enrolled in HealthierSG, yes, reference** | | | | | | | | | | | | | | |
| No | 0·84  [0·70–1·02] | 0·078 | 0·67  [0·55–0·82] | **<0·001** |  | 0·73  [0·63–0·85] | **<0·001** | 0·71  [0·60–0·82] | **<0·001** |  | 0·70  [0·60–0·81] | **<0·001** | 0·60  [0·52–0·70] | **<0·001** |
| Not qualified to enrol | 1·12  [0·67–1·89] | 0·667 | 0·71  [0·42–1·22] | 0·213 |  | 1·42  [0·98–2·06] | 0·066 | 1·32  [0·90–1·93] | 0·160 |  | 0·68  [0·47–0·99] | **0·045** | 0·52  [0·35–0·76] | **<0·001** |
| **Done annual health screening, yes** | 0·93  [0·77–1·13] | 0·463 | 1·09  [0·90–1·32] | 0·383 |  | 1·32  [1·14–1·53] | **<0·001** | 1·37  [1·18–1·59] | **<0·001** |  | 1·48  [1·28–1·71] | **<0·001** | 1·64  [1·41–1·90] | **<0·001** |
| **Paid out of pocket for annual health screening, yes** | 1·20  [0·93–1·54] | 0·160 | 1·17  [0·91–1·52] | 0·221 |  | 1·23  [1·01–1·50] | **0·040** | 1·22  [1·00–1·49] | **0·044** |  | 1·44  [1·18–1·76] | **<0·001** | 3·42  [1·16–1·74] | **<0·001** |

* *p-value refers to the comparison with the reference group*

*Abbreviations: OR=Odds ratio, CI=Confidence interval, BMI=Body mass index*
