# Supplementary material for: Knowledge of lifespan and healthspan and interest in Healthy Longevity Medicine among the general population in Singapore: The Singapore HEalthy LOngevity (HELO) survey
Source: Research Square preprint supplement (doi:10.21203/rs.3.rs-6694270/v1), 2025-07-29
Supplement: Supplementary file 2 [file e4cf7ce0e96773061db6b6c1.docx]

**Supplementary Table S1.** Characteristics of participants stratified according to data collection format.

|  | **n** | **Total (N=3034)** | **Door-to-door (n=2003)** | **Online (n=1031)** |
| --- | --- | --- | --- | --- |
| Chronological age, year, median, IQR | 3029 | 46, [34 – 59] | 46, [34 – 61] | 46, [33 – 58] |
| Perceived age, year, median, IQR | 2999 | 41, [32 – 56] | 40, [32 – 55] | 44, [32 – 56] |
| Gender | | | | |
| Female | 3031 | 1641 (54·1) | 1121 (56·0) | 520 (50·4) |
| Male | 1372 (45·2) | 866 (43·2) | 506 (49·1) |
| Other | 18 (0·6) | 13 (0·6) | 5 (0·5) |
| Ethnicity | | | | |
| Chinese | 3032 | 2155 (71·0) | 1351 (67·4) | 804 (78·0) |
| Indian | 358 (11·8) | 283 (14·1) | 75 (7·3) |
| Malay | 353 (11·6) | 231 (11·5) | 122 (11·8) |
| Others | 166 (5·5) | 127 (6·3) | 24 (2·3) |
| Residency | | | | |
| Citizen | 3033 | 2531 (83·4) | 1638 (81·8) | 893 (86·6) |
| Permanent Resident | 307 (10·1) | 195 (9·7) | 112 (10·9) |
| Non-resident/Foreigner | 195 (6·4) | 169 (8·4) | 26 (2·5) |
| Work | | | | |
| Full-time | 3033 | 1915 (63·1) | 1173 (58·6) | 742 (72·0) |
| Part-time/Casual Worker | 319 (10·5) | 195 (9·7) | 124 (12·0) |
| Retired and working | 53 (1·7) | 44 (2·2) | 9 (0·9) |
| Retired | 393 (13·0) | 329 (16·4) | 64 (6·2) |
| Unemployed | 353 (11·6) | 261 (13·0) | 92 (8·9) |
| Education | | | | |
| Postgraduate Degree | 3033 | 443 (14·6) | 314 (15·7) | 129 (12·5) |
| Undergraduate Degree | 945 (31·1) | 534 (26·7) | 411 (39·9) |
| Diploma / Certificate / Professional Certificate | 864 (28·5) | 547 (27·3) | 317 (30·7) |
| Secondary School or equivalent | 596 (19·6) | 436 (21·8) | 160 (15·5) |
| Primary School or equivalent | 153 (5·0) | 140 (7·0) | 13 (1·3) |
| No formal education | 32 (1·1) | 31 (1·5) | 1 (0·1) |
| Religion | | | | |
| Buddhism | 3032 | 839 (27·7) | 519 (25·9) | 320 (31·0) |
| Christianity | 719 (23·7) | 443 (22·1) | 276 (26·8) |
| Islam | 457 (15·1) | 311 (15·5) | 146 (14·2) |
| Hinduism | 230 (7·6) | 188 (9·4) | 42 (4·1) |
| Taoism | 157 (5·2) | 105 (5·2) | 52 (5·0) |
| No religion | 559 (18·4) | 373 (18·6) | 186 (18·0) |
| Other religion | 71 (2·3) | 62 (3·1) | 9 (0·9) |
| Marital status | | | | |
| Married | 3034 | 1940 (63·9) | 1319 (65·9) | 621 (60·2) |
| Single (never married) | 857 (28·2) | 495 (24·7) | 362 (35·1) |
| Divorced | 120 (4·0) | 95 (4·7) | 25 (2·4) |
| Widowed | 97 (3·2) | 83 (4·1) | 14 (1·4) |
| Separated | 20 (0·7) | 11 (0·5) | 9 (0·9) |
| Children, yes | 3034 | 1847 (60·9) | 1293 (64·6) | 554 (53·7) |
| Grandchildren, no | 3029 | 2610 (86·0) | 1670 (83·4) | 940 (91·2) |
| Family members past 90 years | | | | |
| No | 2773 | 1826 (60·2) | 1224 (70.3) | 602 (58·4) |
| Yes | 873 (28·8) | 518 (29.7) | 355 (34·4) |
| Don’t know | 74 (2·4) | 0 | 74 (7·2) |
| Household income | | | | |
| $500 or below | 3025 | 103 (3·4) | 87 (4·3) | 16 (1·6) |
| $501 – $1,000 | 117 (3·9) | 106 (5·3) | 11 (1·1) |
| $1,001 – $2,500 | 249 (8·2) | 191 (9·5) | 58 (5·6) |
| $2,501 – $5,000 | 527 (17·4) | 339 (16·9) | 188 (18·2) |
| $5,001 – $10,000 | 817 (26·9) | 425 (21·2) | 392 (38·0) |
| $10,001 or more | 807 (26·6) | 462 (23·1) | 345 (33·5) |
| Refuse to answer | 405 (13·3) | 384 (19·2) | 21 (2·0) |
| Individual income | | | | |
| No income | 3032 | 518 (17.1) | 440 (22.0) | 78 (7.6) |
| $500 or below |  | 86 (2·8) | 46 (2·3) | 40 (3·9) |
| $501 – $1,000 | 179 (5·9) | 117 (5·8) | 62 (6·0) |
| $1,001 – $2,500 | 381 (12·6) | 248 (12·4) | 133 (12·9) |
| $2,501 – $5,000 | 782 (25·8) | 441 (22·0) | 341 (33·1) |
| $5,001 – $10,000 | 620 (20·4) | 343 (17·1) | 277 (26·9) |
| $10,001 or more | 229 (7·5) | 154 (7·7) | 75 (7·3) |
| Refuse to answer | 237 (7·8) | 212 (10·6) | 25 (2·4) |
| Housing | | | | |
| HDB 1-room or 2-room | 3029 | 121 (4·0) | 74 (3·7) | 47 (4·6) |
| HDB 3-room | 612 (20·2) | 427 (21·3) | 185 (17·9) |
| HDB 4-room | 1058 (34·9) | 697 (34·8) | 361 (35·0) |
| HDB 5-room or Executive | 813 (26·8) | 587 (29·3) | 226 (21·9) |
| Condominium or other apartment | 335 (11·0) | 155 (7·7) | 180 (17·5) |
| Landed / Others | 90 (2·9) | 58 (2·9) | 31 (3·0) |
| Height, cm, median, IQR | 3024 | 164, [158 – 171] | 163, [157 – 170] | 165, [159 – 171] |
| Weight, kg, median, IQR | 3029 | 63, [55 – 74] | 64, [55 – 75] | 62, [53 – 72] |
| BMI, kg/m2, median, IQR | 3023 | 23·4, [20·9 – 26·6] | 23·8, [21·3 – 27·0] | 22·7, [20·3 – 25·5] |
| Chronic disease, no | 3030 | 2355 (77·6) | 1508 (75·3) | 847 (82·2) |
| Medications taken, no | 3033 | 2052 (67·6) | 1331 (66·5) | 721 (69·9) |
| Supplements use, yes | 3031 | 1519 (50·1) | 938 (46·8) | 581 (56·4) |
| Alcohol consumption per week | | | | |
| 0 | 3033 | 2098 (69·1) | 1490 (74·4) | 608 (59·0) |
| 1 –7 drinks | 796 (26·2) | 433 (21·6) | 363 (35·2) |
| 8 –14 drinks | 54 (1·8) | 21 (1·0) | 33 (3·2) |
| 15+ drinks | 37 (1·2) | 16 (0·8) | 21 (2·0) |
| Refuse to answer | 48 (1·6) | 42 (2·1) | 6 (0·6) |
| Smoking | | | | |
| Never smoked | 3030 | 2442 (80·5) | 1648 (82·3) | 794 (77·0) |
| Used to smoke regularly | 312 (10·3) | 202 (10·1) | 110 (0·7) |
| Currently smoke | 276 (9·1) | 149 (7·4) | 127 (12·3) |
| Exercise | | | | |
| 0 days | 3028 | 579 (19·1) | 422 (21·1) | 157 (15·2) |
| 1 day | 416 (13·7) | 271 (13·5) | 145 (14·1) |
| 2 days | 501 (16·5) | 327 (16·3) | 174 (16·9) |
| 3 days | 571 (18·8) | 356 (17·8) | 215 (20·9) |
| 4 days | 280 (9·2) | 185 (9·2) | 95 (9·2) |
| 5 days | 297 (9·8) | 184 (9·2) | 113 (11·0) |
| 6 days | 88 (2·9) | 50 (2·5) | 38 (3·7) |
| 7 days | 296 (9·8) | 202 (10·1) | 94 (9·1) |
| Health Insurance | | | | |
| Government | 3034 | 2051 (67·6) | 1355 (67·65) | 696 (67·51) |
| Private | 835 (27·52) | 534 (26·66) | 301 (29·19) |
| None | 148 (4·88) | 114 (5·69) | 34 (3·30) |
| Enrolled in HealthierSG | | | | |
| No | 3033 | 1478 (48·7) | 1046 (52·2) | 432 (41·9) |
| Yes | 1435 (47·3) | 858 (42·8) | 577 (56·0) |
| Not qualified to enrol | 120 (4·0) | 98 (4·9) | 22 (2·1) |
| Done annual health screening, yes | 3032 | 1634 (53·9) | 1048 (52·3) | 586 (56·8) |

*Notes: Data are presented as n (%) unless otherwise indicated.*

*Abbreviations: IQR=Interquartile range, HDB=Housing Development Board, BMI=Body mass index*
